# Supplementary material for: Assessing the effect of model specification and prior sensitivity on Bayesian tests of temporal signal
Source: PubMed Central journal article supplement (PMC11573219; doi:10.1371/journal.pcbi.1012371), 2024-11-06

Vibrio cholerae

Strict Clock

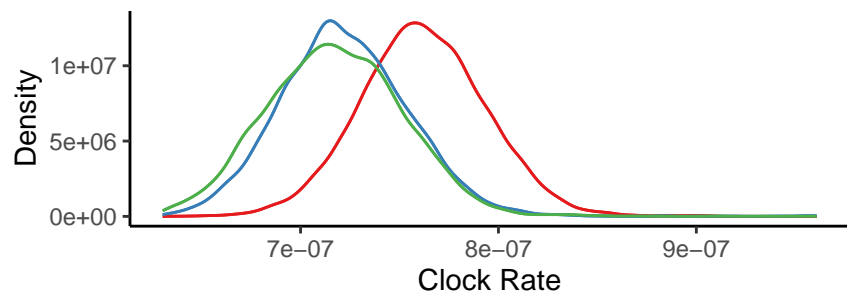

Uncorrelated Lognormal Relaxed Clock

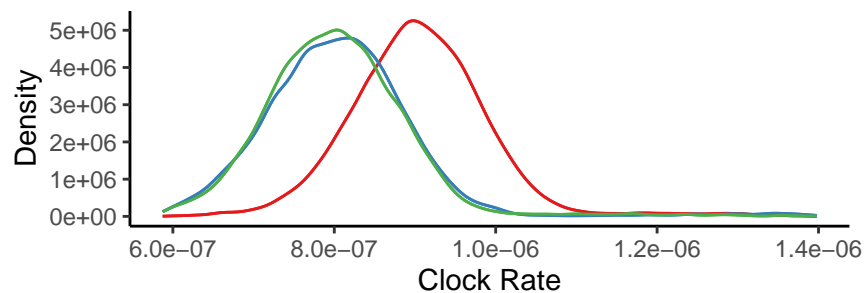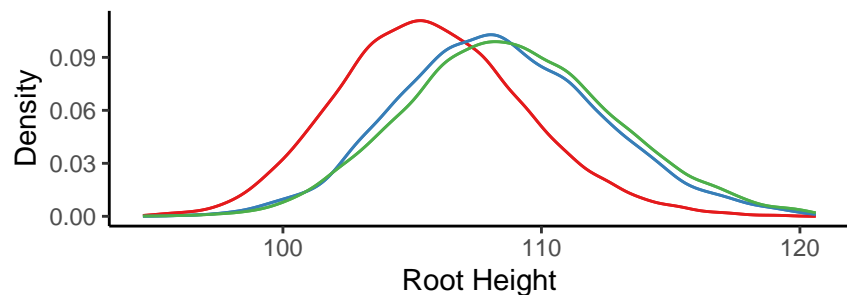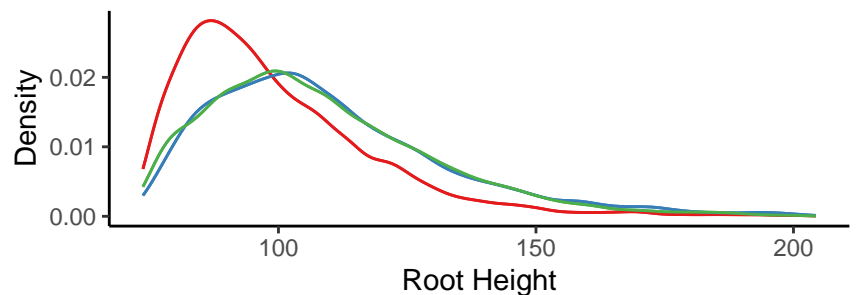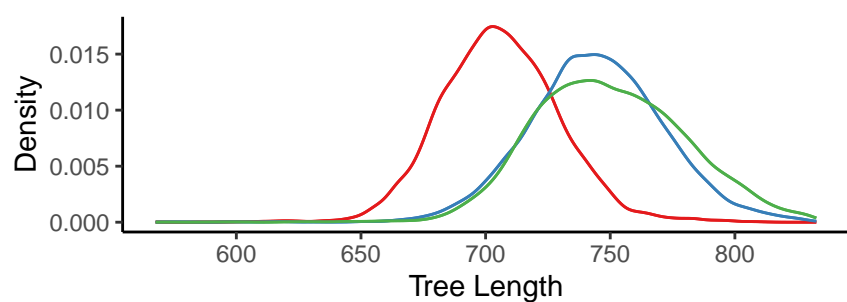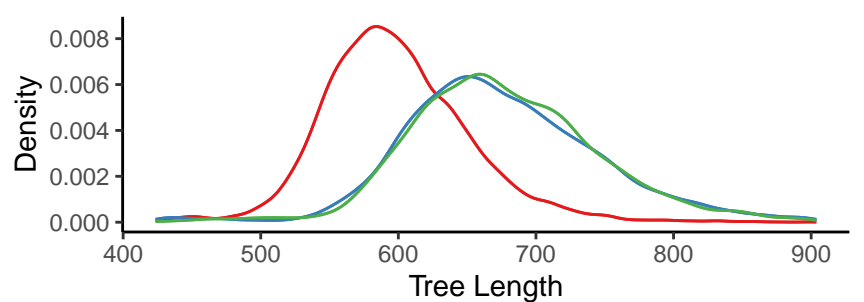

Prior

Exponential

Gamma

Lognormal

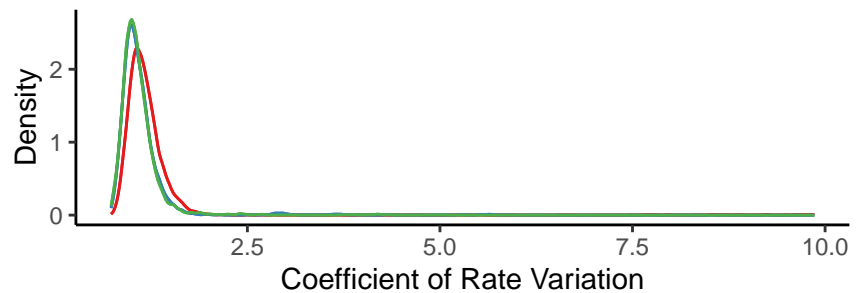

Supplement: pcbi.1012371.s001.pdf [file pcbi.1012371.s001.pdf]
