# Supplementary material for: Assessing the effect of model specification and prior sensitivity on Bayesian tests of temporal signal
Source: PubMed Central journal article supplement (PMC11573219; doi:10.1371/journal.pcbi.1012371), 2024-11-06

# Powassan Virus

## Strict Clock

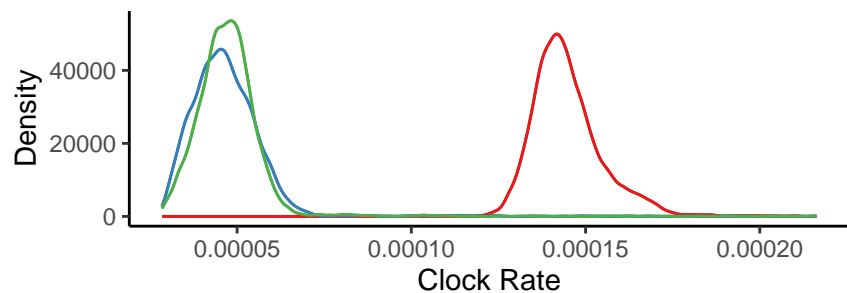

## Uncorrelated Lognormal Relaxed Clock

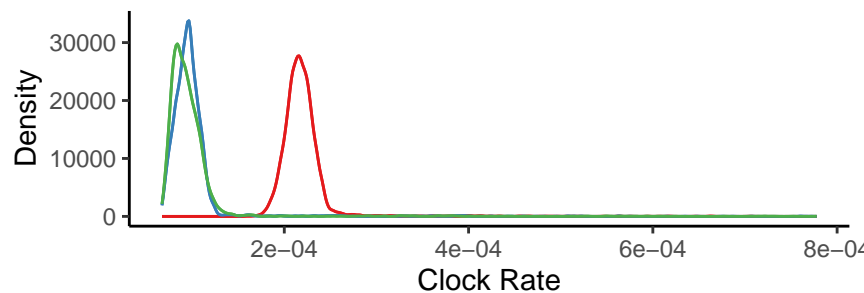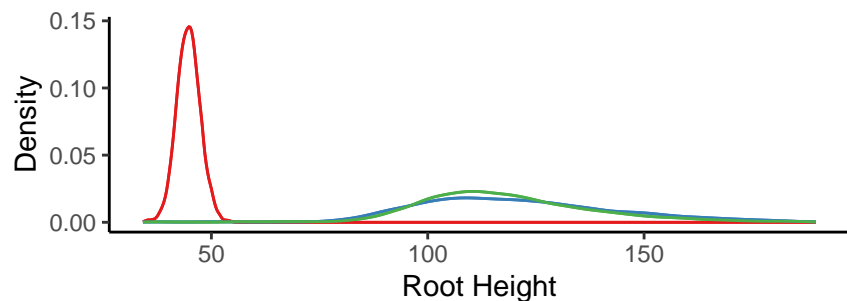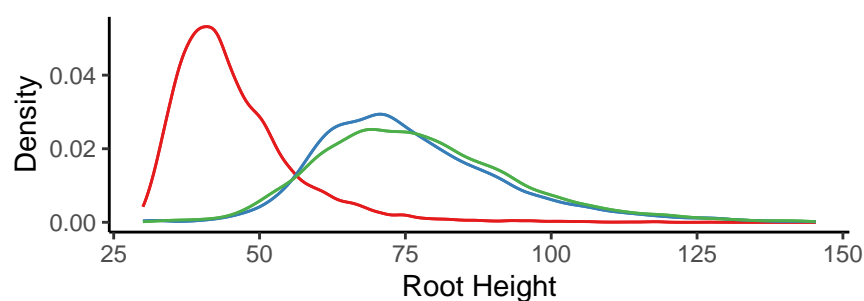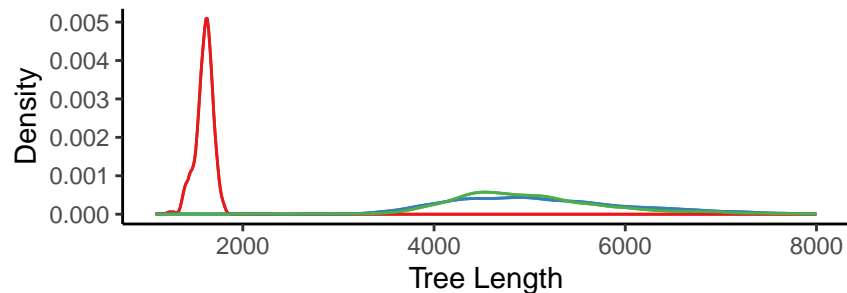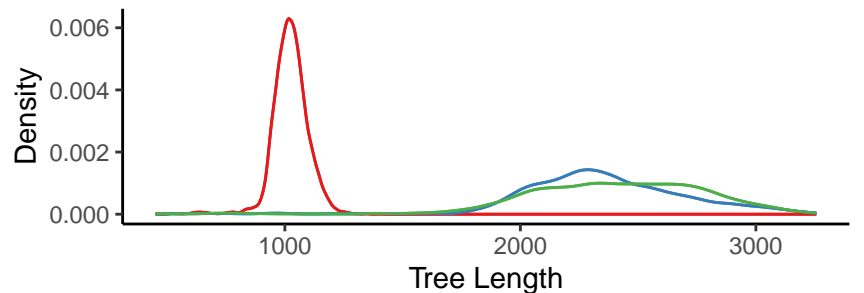

Prior

— Exponential

— Gamma

— Lognormal

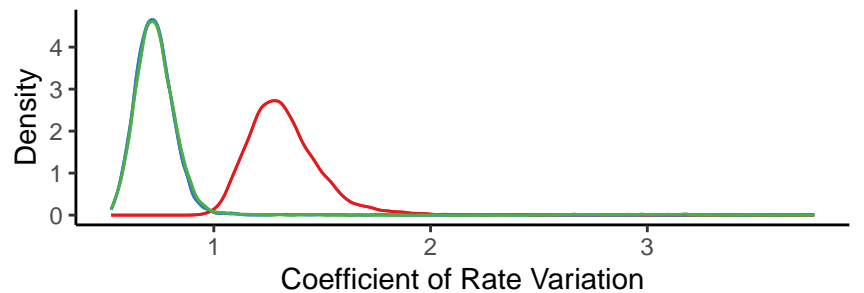

Supplement: pcbi.1012371.s002.pdf [file pcbi.1012371.s002.pdf]
