# Supplementary material for: Assessing the effect of model specification and prior sensitivity on Bayesian tests of temporal signal
Source: PubMed Central journal article supplement (PMC11573219; doi:10.1371/journal.pcbi.1012371), 2024-11-06
Supplement: pcbi.1012371.s004.pdf [file pcbi.1012371.s004.pdf]

## Vibrio cholerae

Strict clock (SC)

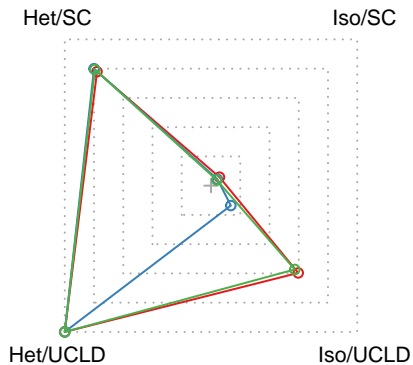

Relaxed clock (UCLD)

## Powassan virus

Strict clock (SC)

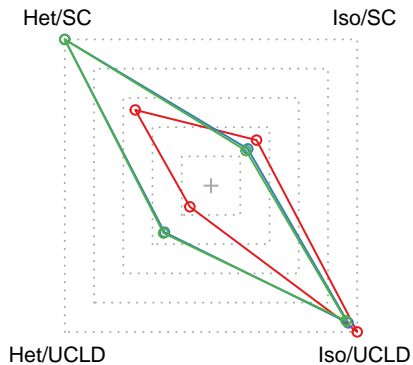

Relaxed clock (UCLD)

## Treponema pallidum

Strict clock (SC)

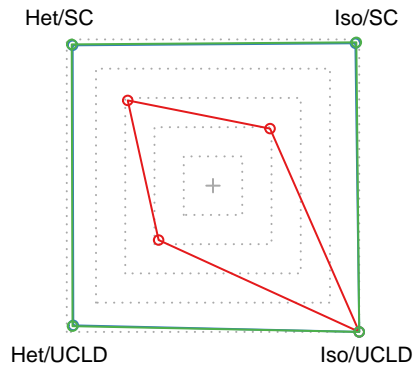

Relaxed clock (UCLD)

—○— Exponential    —○— Gamma    —○— Lognormal
