# Supplementary material for: Assessing the effect of model specification and prior sensitivity on Bayesian tests of temporal signal
Source: PubMed Central journal article supplement (PMC11573219; doi:10.1371/journal.pcbi.1012371), 2024-11-06
Supplement: pcbi.1012371.s005.pdf [file pcbi.1012371.s005.pdf]

### Heterochronous, exponential prior

Strict clock (SC)

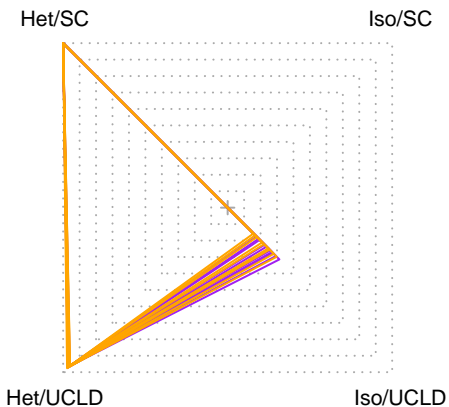

Relaxed clock (UCLD)

### Heterochronous, lognormal prior

Strict clock (SC)

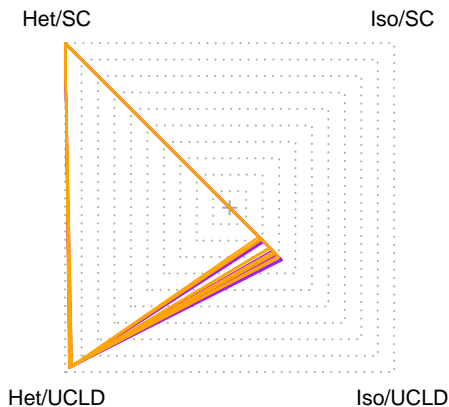

Relaxed clock (UCLD)

### Heterochronous, gamma prior

Strict clock (SC)

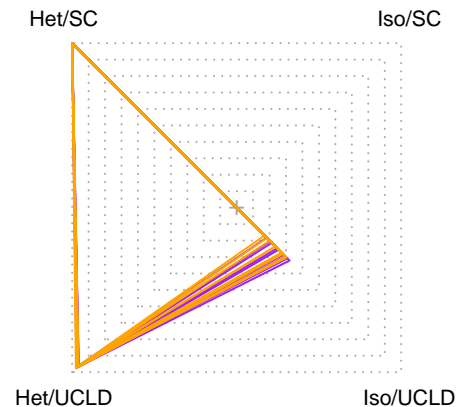

Relaxed clock (UCLD)

### Isochronous, exponential prior

Strict clock (SC)

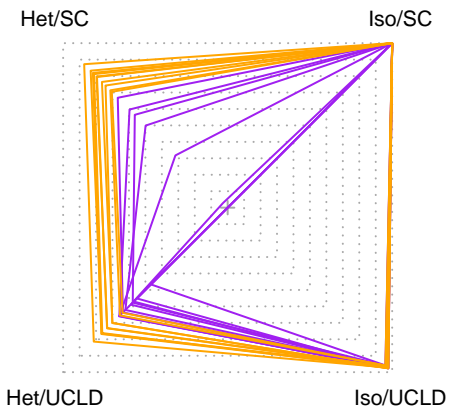

Relaxed clock (UCLD)

### Isochronous, lognormal prior

Strict clock (SC)

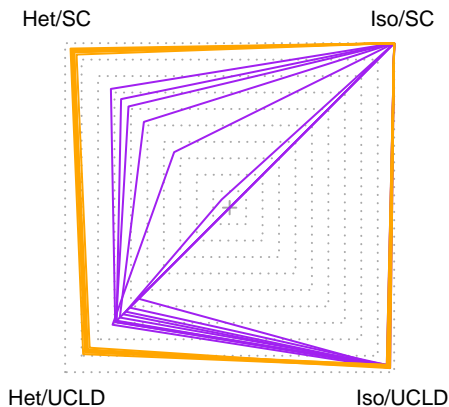

Relaxed clock (UCLD)

### Isochronous, gamma prior

Strict clock (SC)

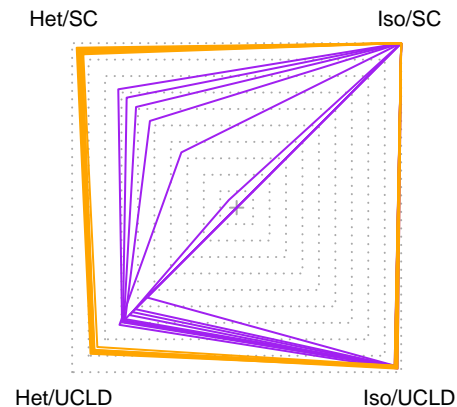

Relaxed clock (UCLD)

— Bounds on rootheight — No bounds on rootheight
