# Supplementary material for: Assessing the effect of model specification and prior sensitivity on Bayesian tests of temporal signal
Source: PubMed Central journal article supplement (PMC11573219; doi:10.1371/journal.pcbi.1012371), 2024-11-06
Supplement: pcbi.1012371.s006.pdf [file pcbi.1012371.s006.pdf]

Isochronous, exponential prior

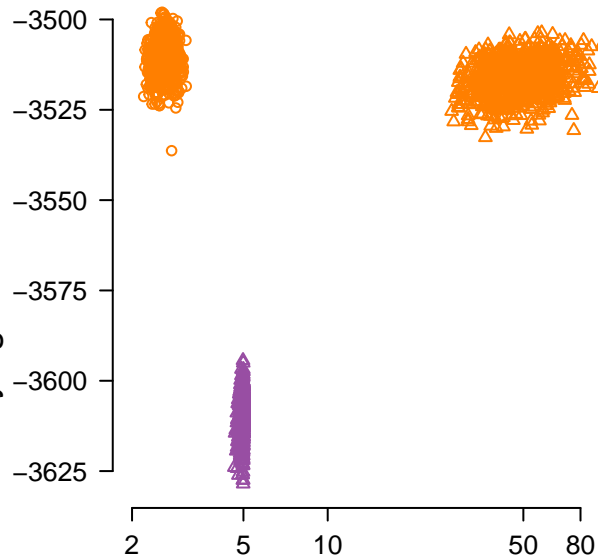

Isochronous, lognormal prior

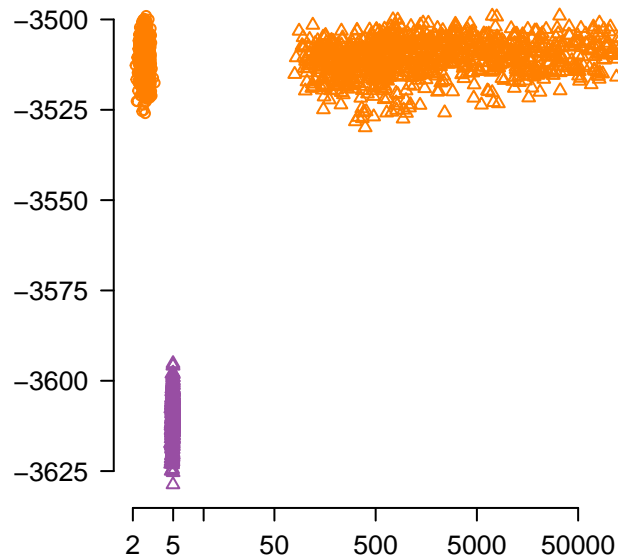

Isochronous, gamma prior

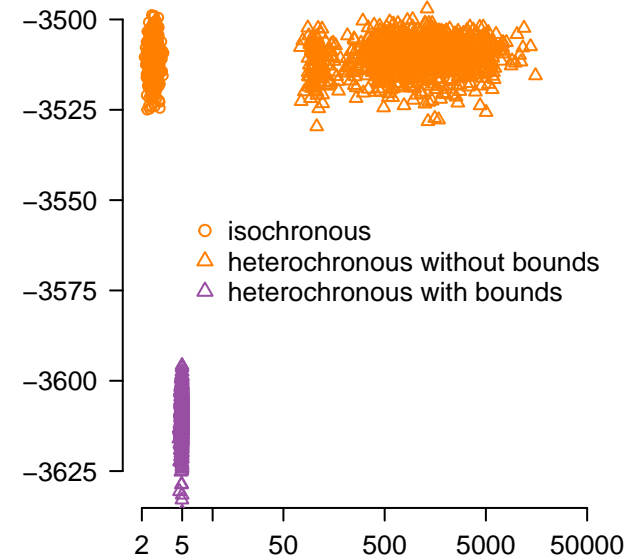

Root height
